# Supplementary material for: Highly dispersed MoSx nanodot-modified TiO2 photocatalysts: vitamin C-mediated synthesis and improved H2 evolution activity
Source: Royal Society of Chemistry journal article supplement (doi:10.1039/d0tc06095j), 2021-01-01
Supplement: d0tc06095j1.pdf [file d0tc06095j1.pdf]

## Supporting Information

### **Highly dispersed MoS<sub>x</sub> nanodot-modified TiO<sub>2</sub> photocatalyst: Vitamin C-mediated synthesis and improved H<sub>2</sub> evolution activity**

Jiangyuan He,<sup>a</sup> Wei Zhong,<sup>b</sup> Ying Xu<sup>a\*</sup>, Jiajie Fan,<sup>c</sup> Huogen Yu<sup>a, b\*</sup> and Jiaguo Yu<sup>d</sup>

<sup>a</sup> School of Chemistry, Chemical Engineering and Life Sciences, Wuhan University of Technology, Wuhan 430070, P. R. China

<sup>b</sup> State Key Laboratory of Silicate Materials for Architectures, Wuhan University of Technology, Wuhan 430070, P. R. China

<sup>c</sup> School of Materials Science and Engineering, Zhengzhou University, Zhengzhou 450002, PR China

<sup>d</sup> State Key Laboratory of Advanced Technology for Material Synthesis and Processing, Wuhan University of Technology, Wuhan 430070, PR China

E-mail: xuy6289@whut.edu.cn; yuhuogen@whut.edu.cn

### SI-1 The AQE calculation

The apparent quantum efficiency (AQE) of the prepared photocatalyst is calculated via the following equation:

$$\begin{aligned} \text{AQE}(\%) &= \frac{\text{number of reacted electrons}}{\text{number of incident photons}} \times 100\% \\ &= \frac{\text{number of evolved H}_2 \text{ molecules} \times 2}{\text{number of incident photons}} \times 100\% \end{aligned}$$

The average power of the UV light (four 3-W 365 nm) was 22.4 mW/cm<sup>2</sup>. Hence, the AQE of the TiO<sub>2</sub>@C/MoS<sub>x</sub>(0.7 wt%) photocatalyst can be calculated to be 3.94%.

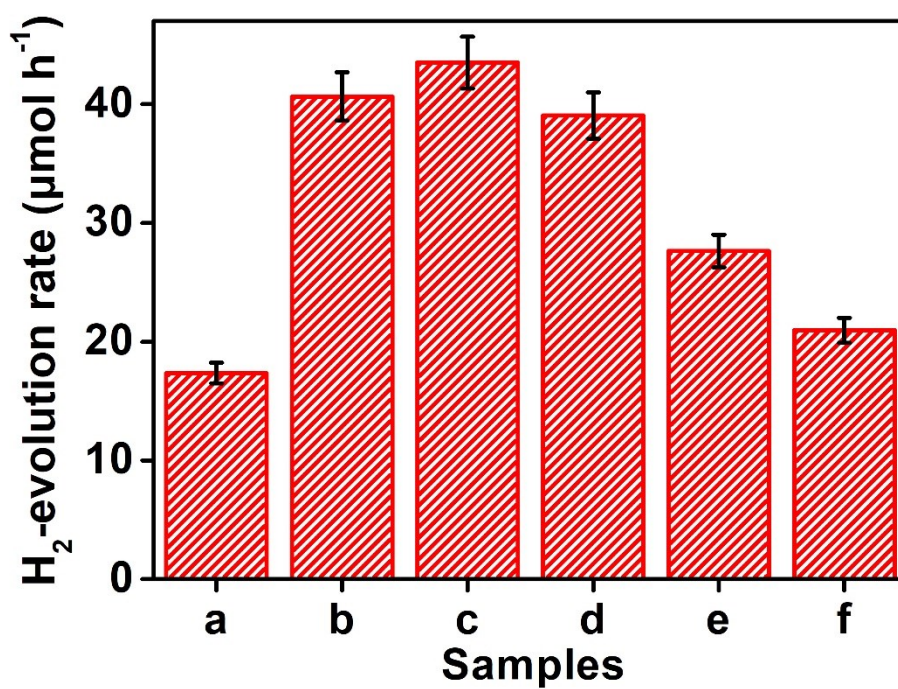

**Fig. S1.** The influence of VC amount on the photocatalytic H<sub>2</sub>-evolution activities of TiO<sub>2</sub>@C/MoS<sub>x</sub>(1.0%) photocatalyst: (a) 0 mg, (b) 5 mg, (c) 9 mg, (d) 15 mg, (e) 20 mg, (f) 50 mg.

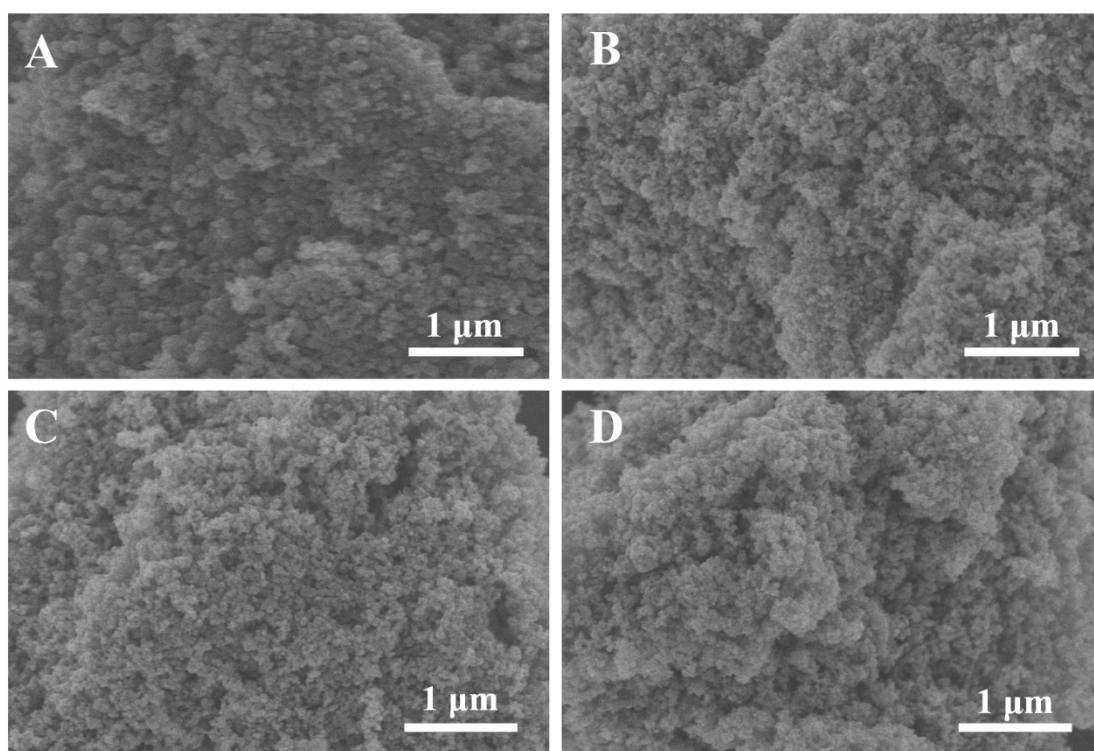

**Fig. S2.** FESEM images of different photocatalysts: (a)  $\text{TiO}_2$ , (b)  $\text{TiO}_2@\text{C}$ , (c)  $\text{TiO}_2@\text{C}/\text{MoS}_x(0.7\%)$ , (d)  $\text{TiO}_2/\text{MoS}_x(0.7\%)$ .

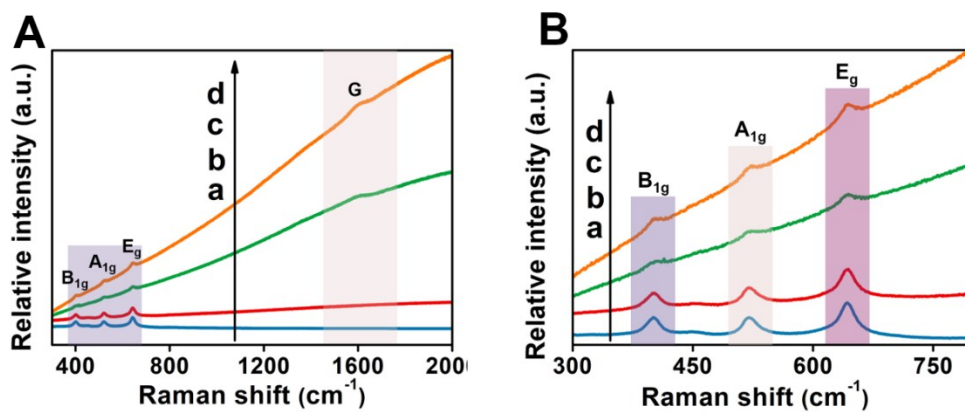

**Fig. S3.** (A) Raman spectra, (B) The enlarged Raman spectra of different samples: (a) TiO<sub>2</sub>, (b) TiO<sub>2</sub>/MoS<sub>x</sub>(0.7%), (c) TiO<sub>2</sub>@C/MoS<sub>x</sub>(0.7%), (d) TiO<sub>2</sub>@C.

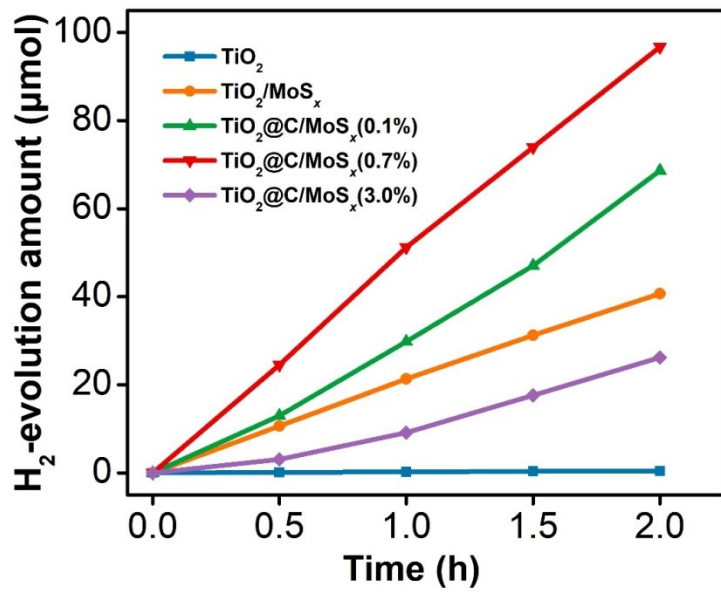

**Fig. S4.** Photocatalytic H<sub>2</sub>-evolution activities of typical TiO<sub>2</sub> and MoS<sub>x</sub>-modified photocatalysts.
